# Supplementary material for: The synthesis of quinolines via denitrogenative palladium-catalyzed cascade reaction of o-aminocinnamonitriles with arylhydrazines
Source: Royal Society of Chemistry journal article supplement (doi:10.1039/d0ra01043j), 2020-01-01

## Supporting Information

### The Synthesis of Quinolines via Denitrogenative Palladium-Catalyzed Cascade Reaction of *o*-Aminocinnamitriles with Arylhydrazines

Jing Xie, Hang Huang, Tong Xu, Renhao Li, Jiuxi Chen\* and Xueting Ye\*

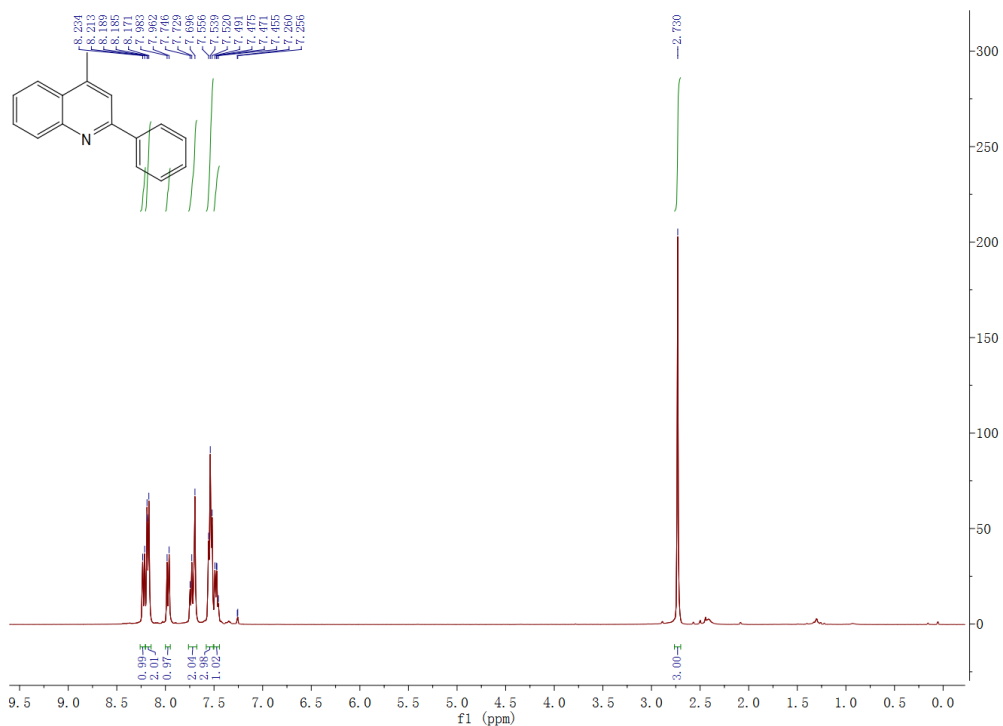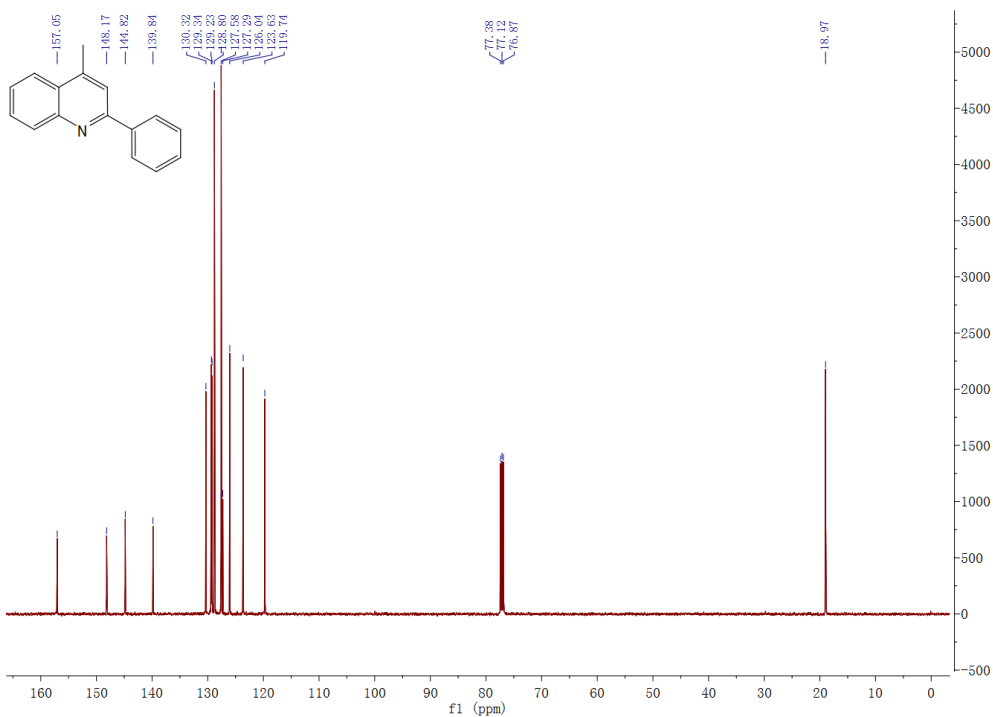

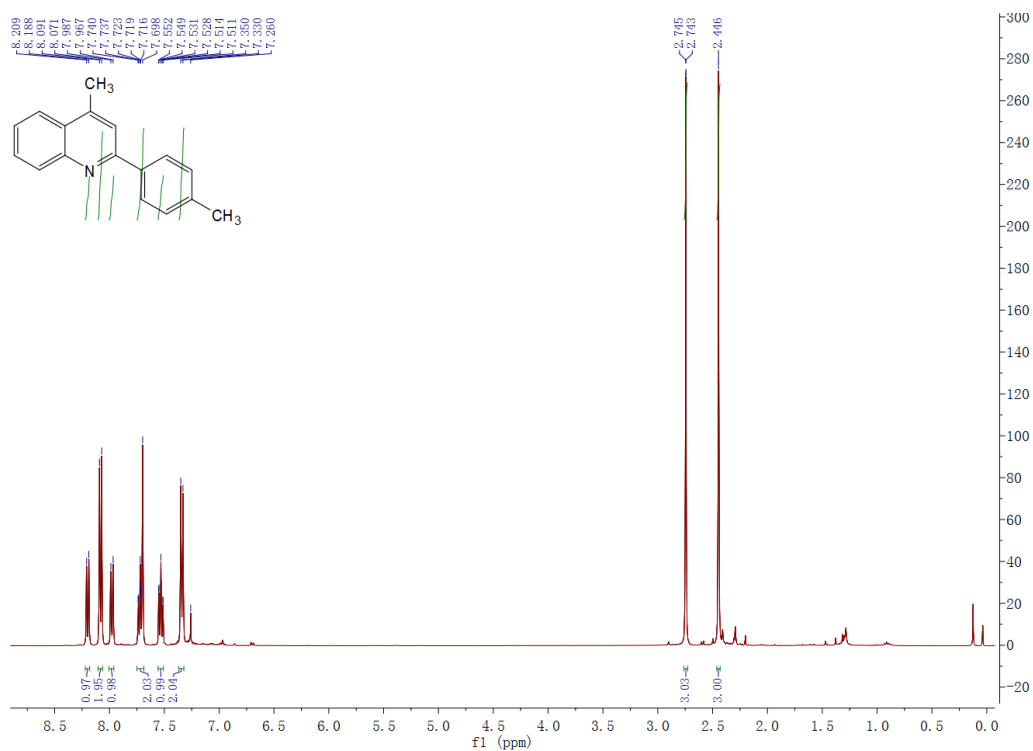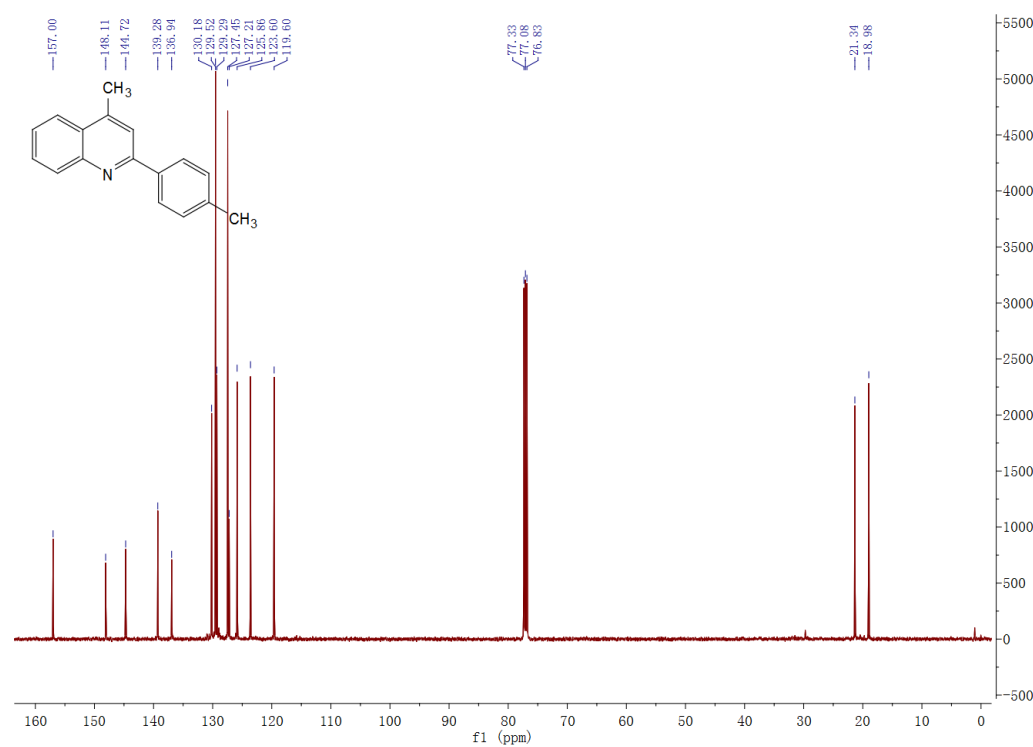

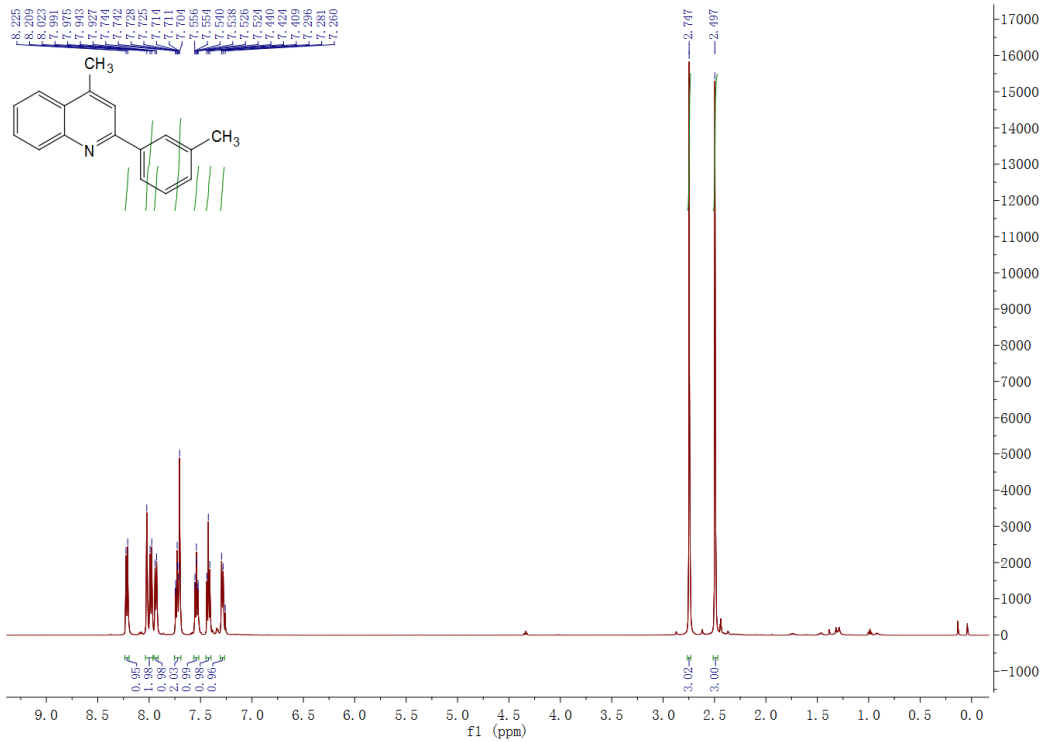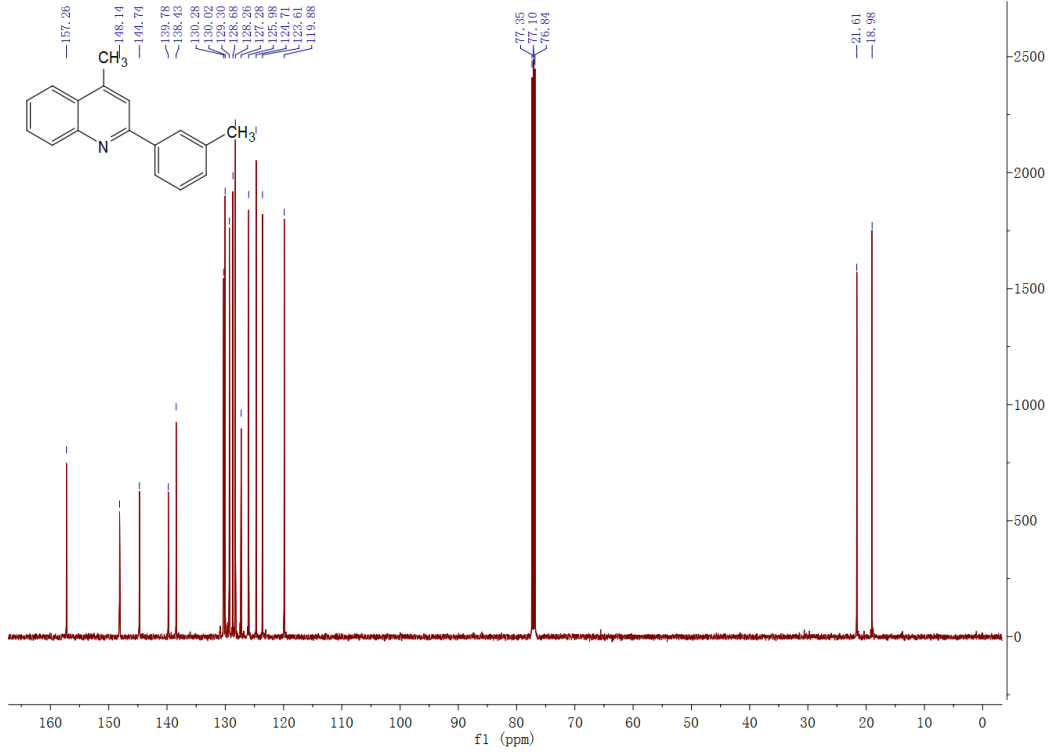

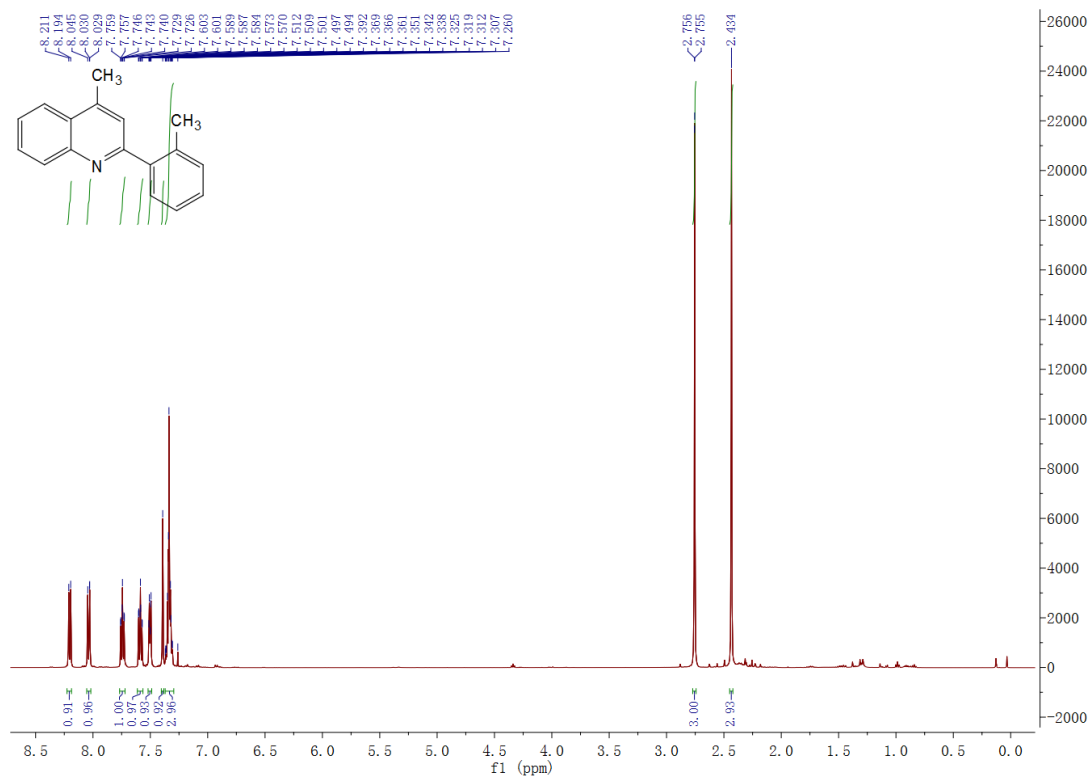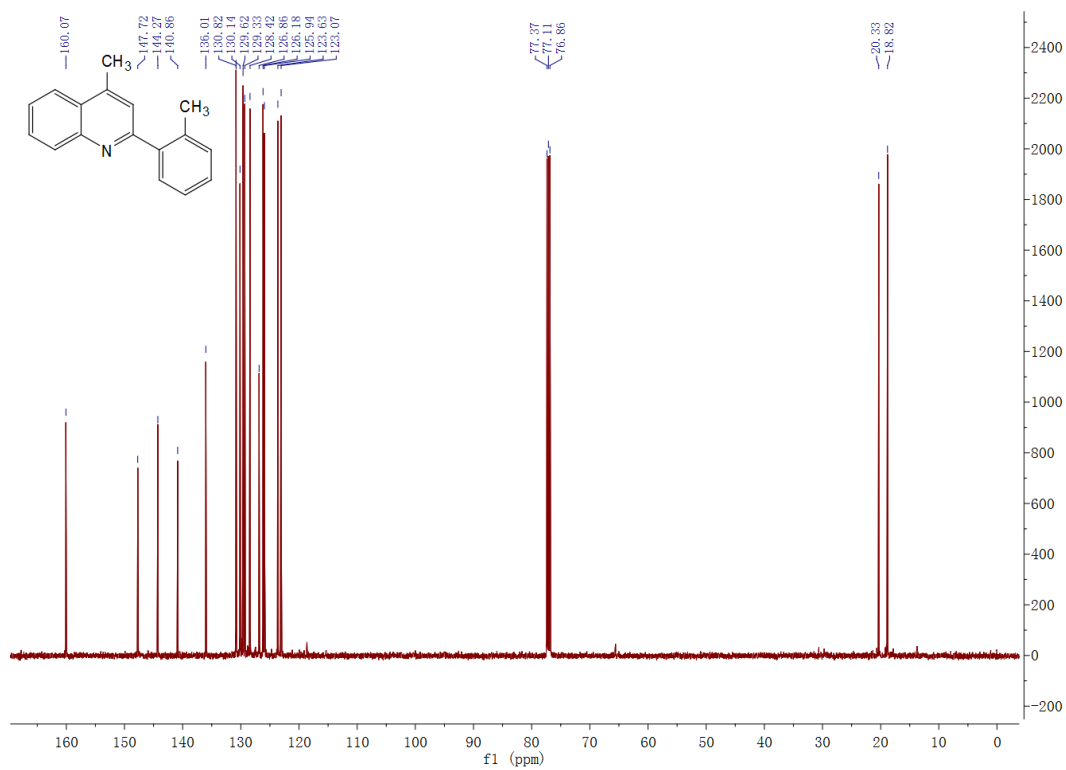

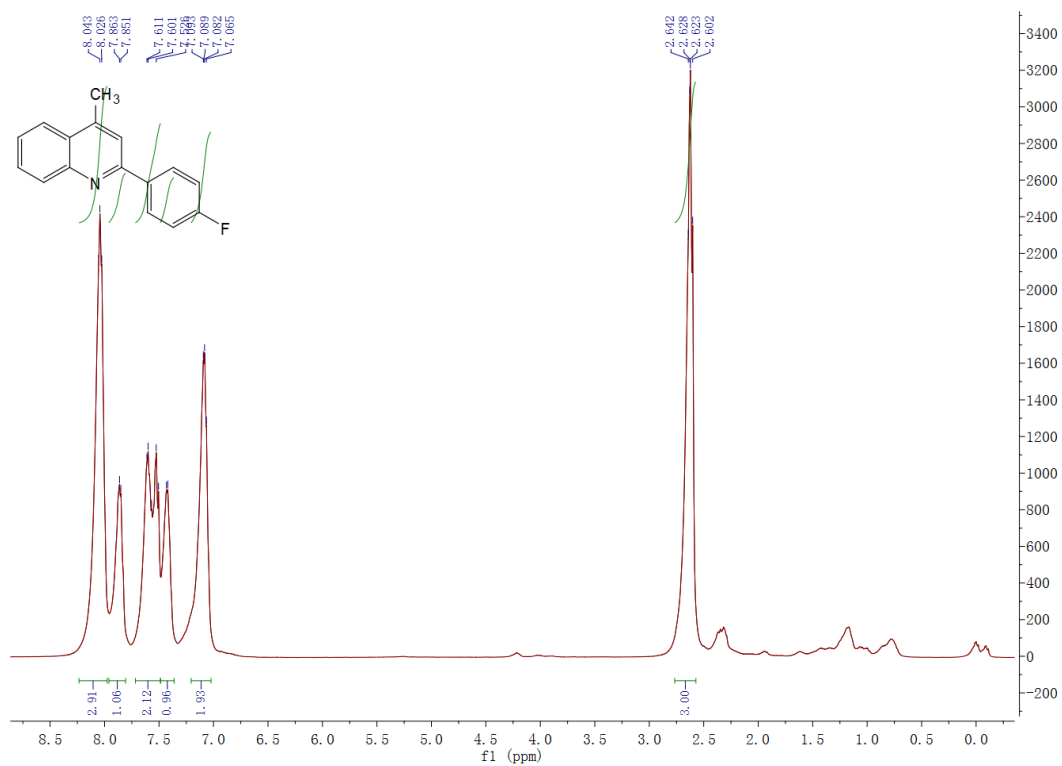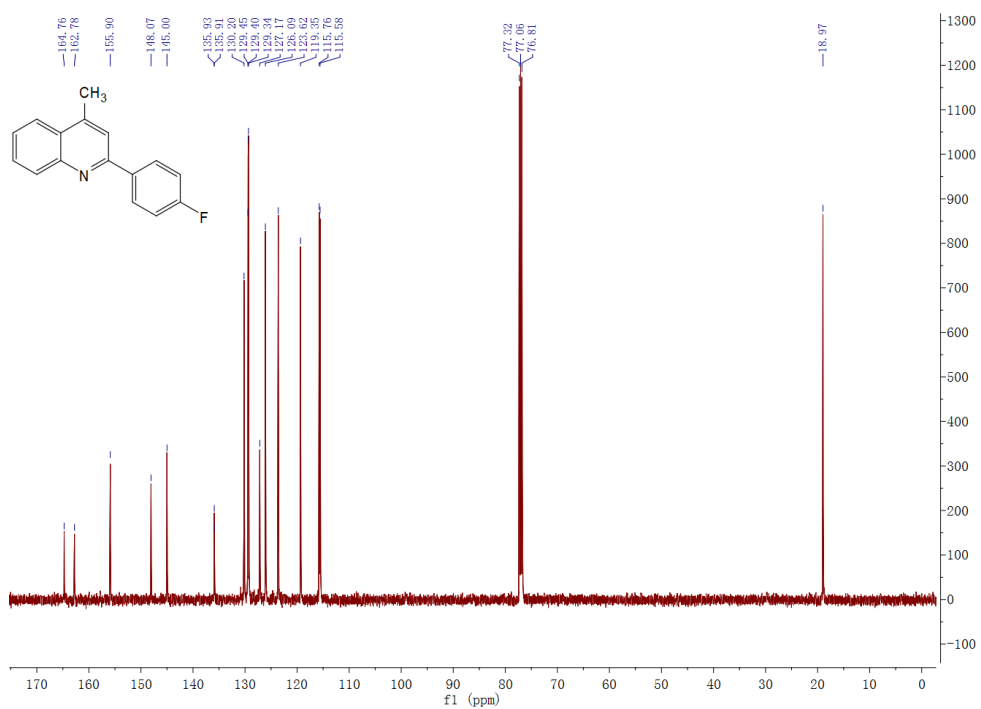

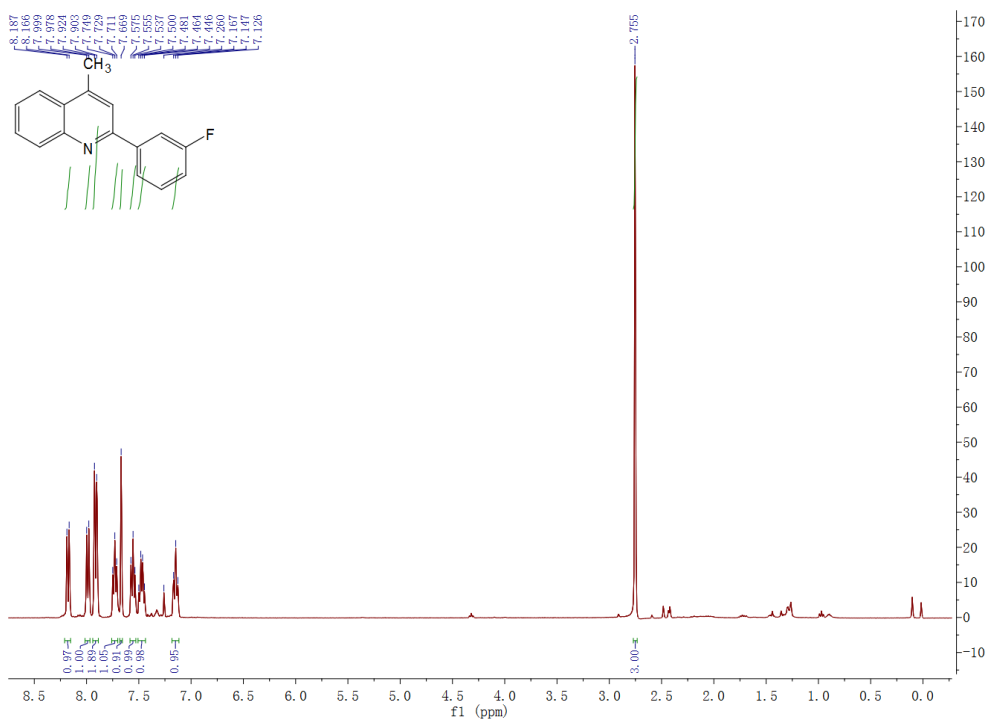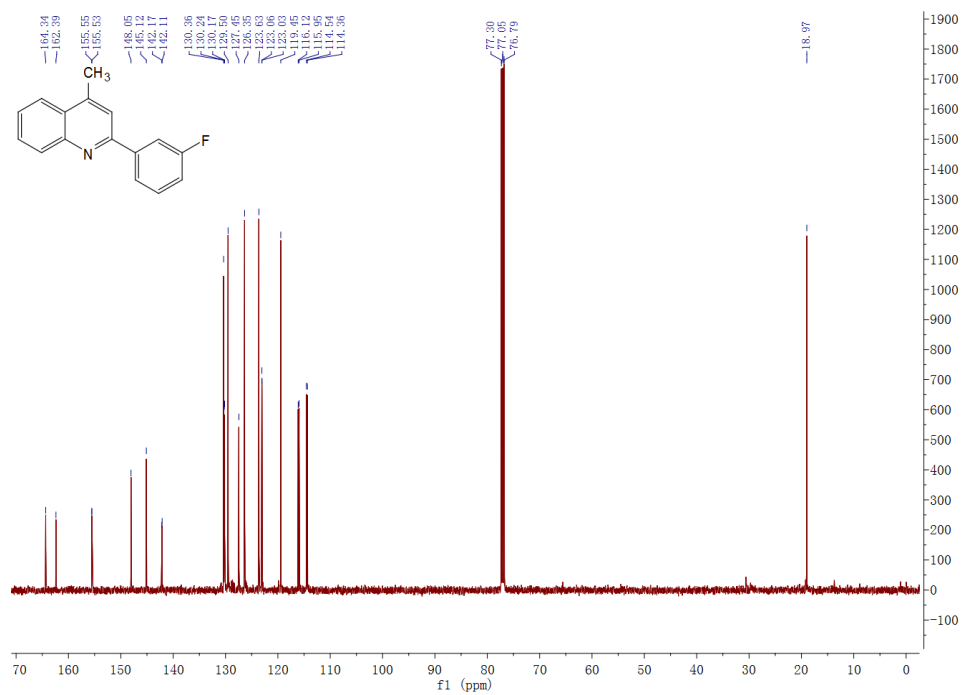

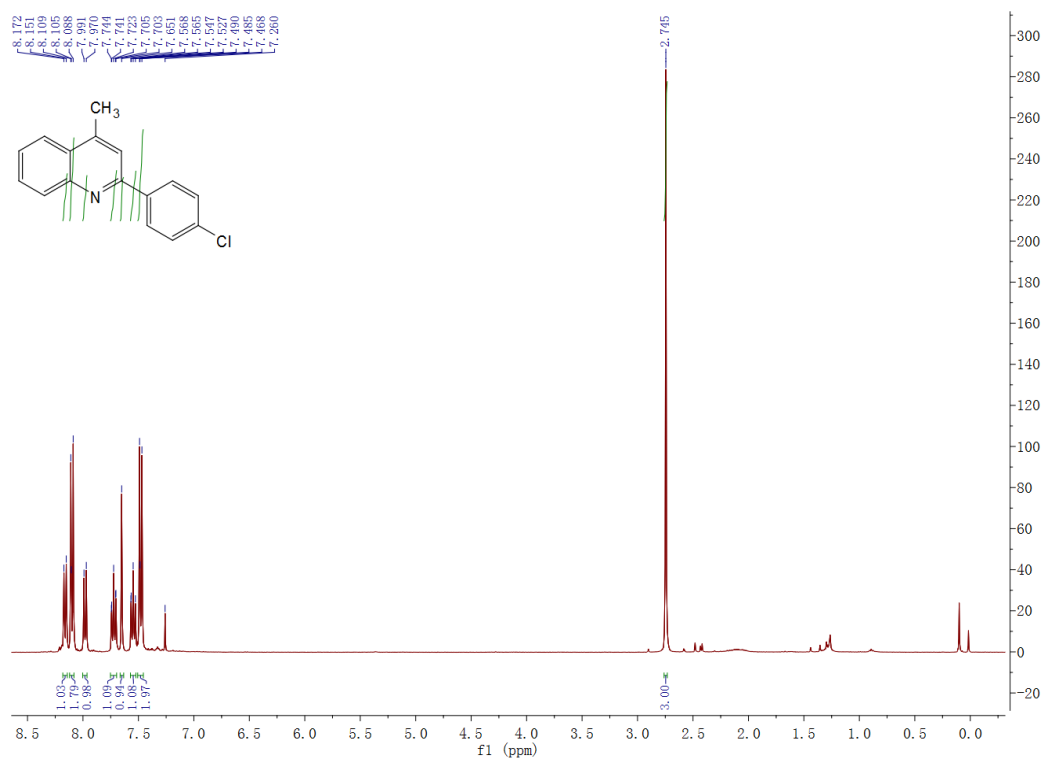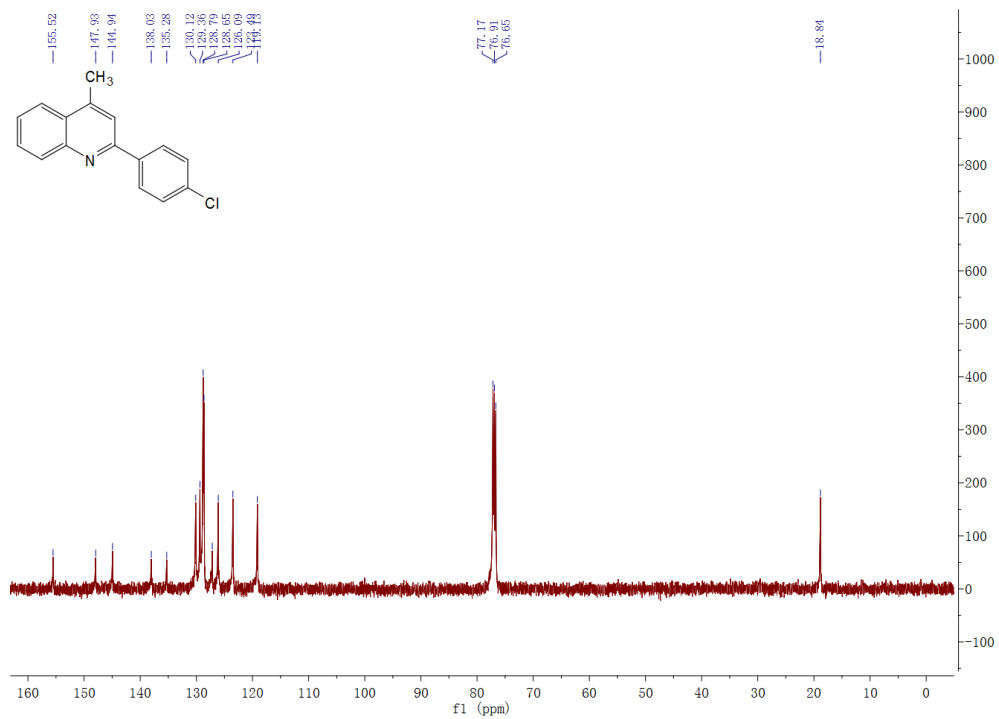

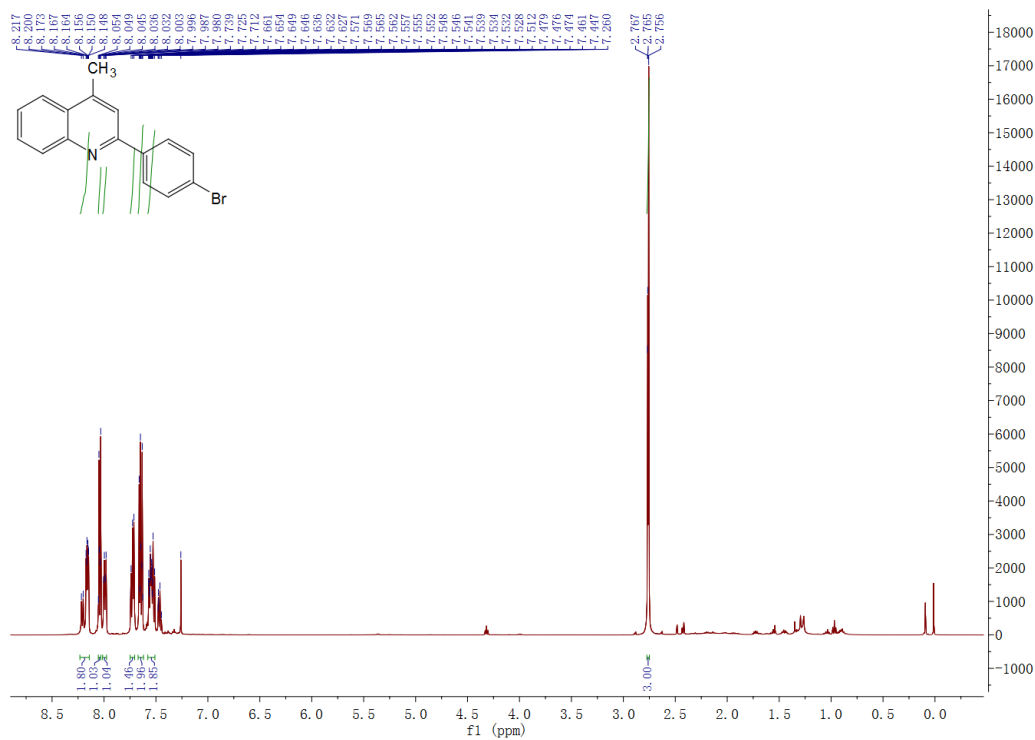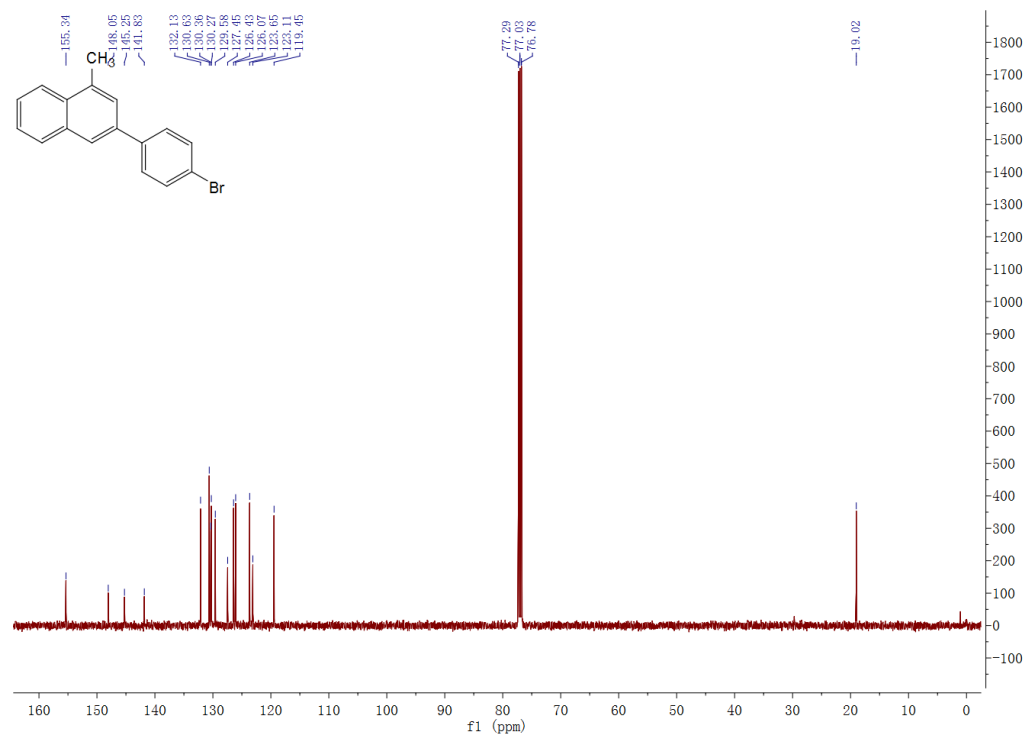



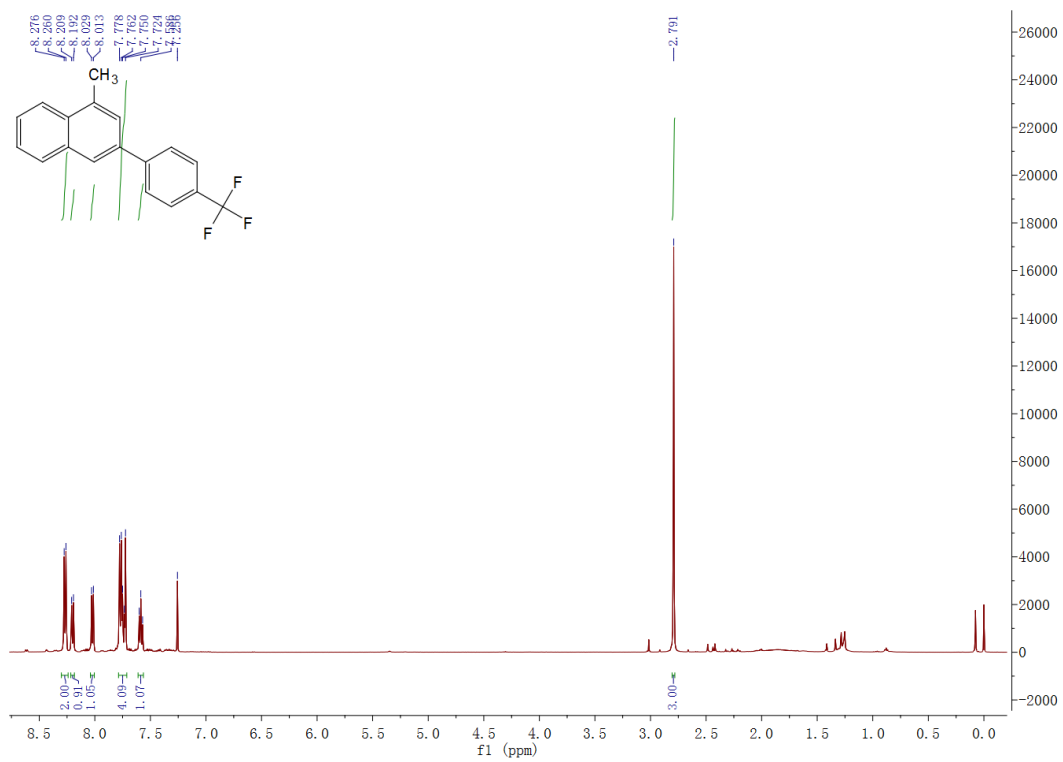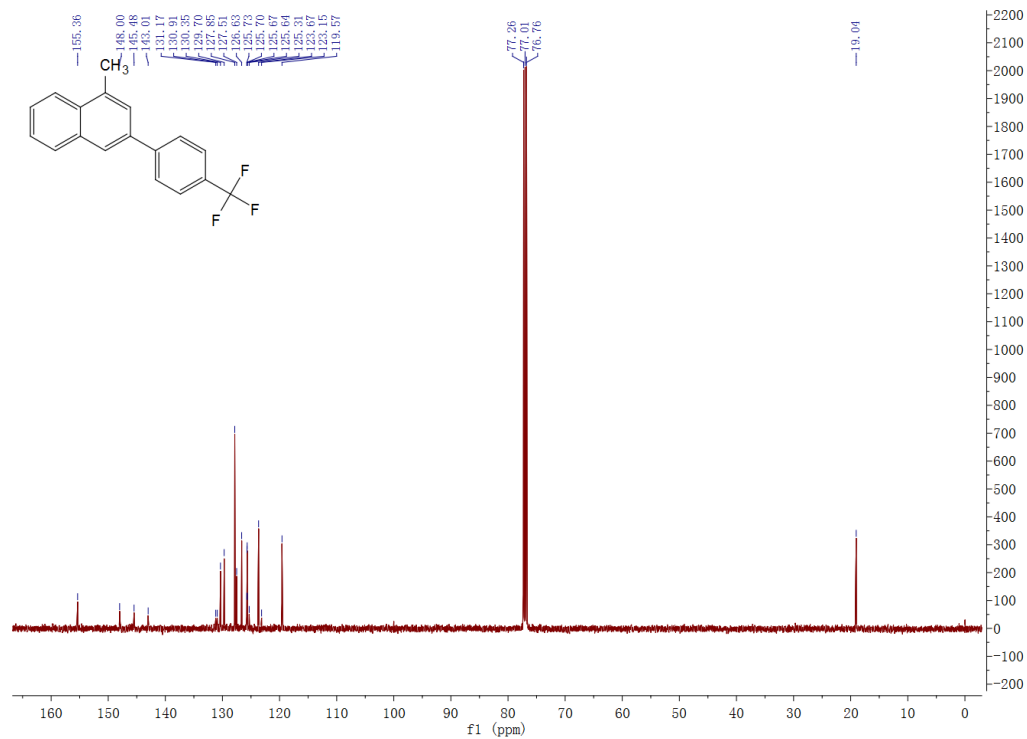

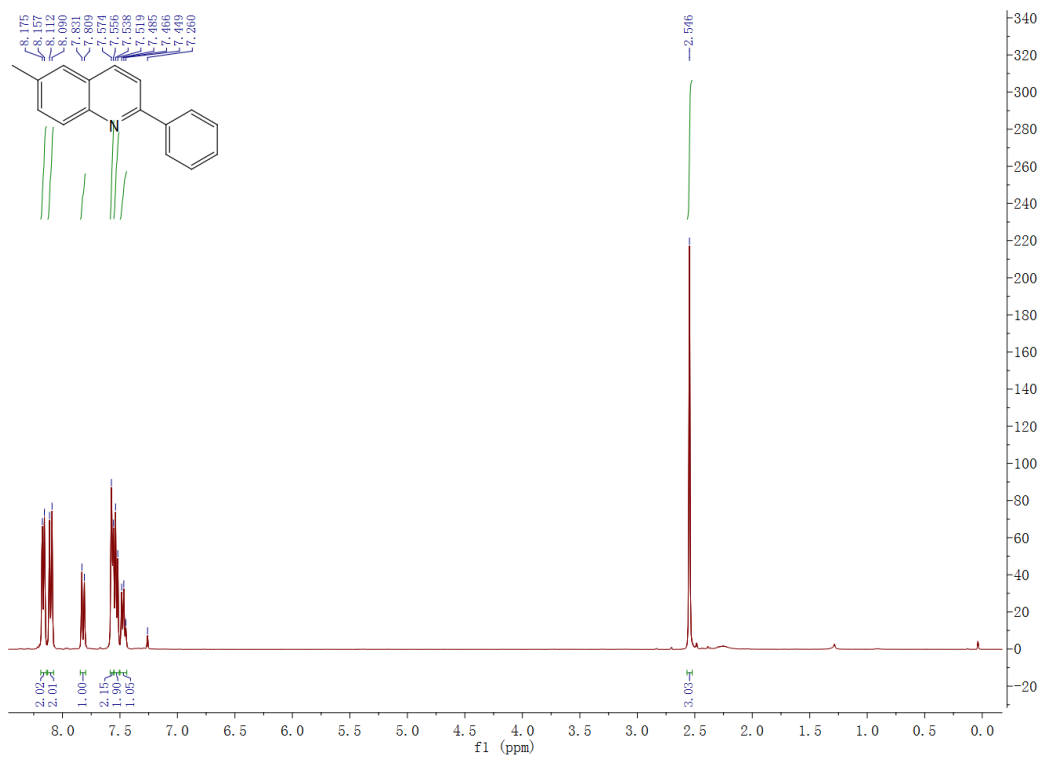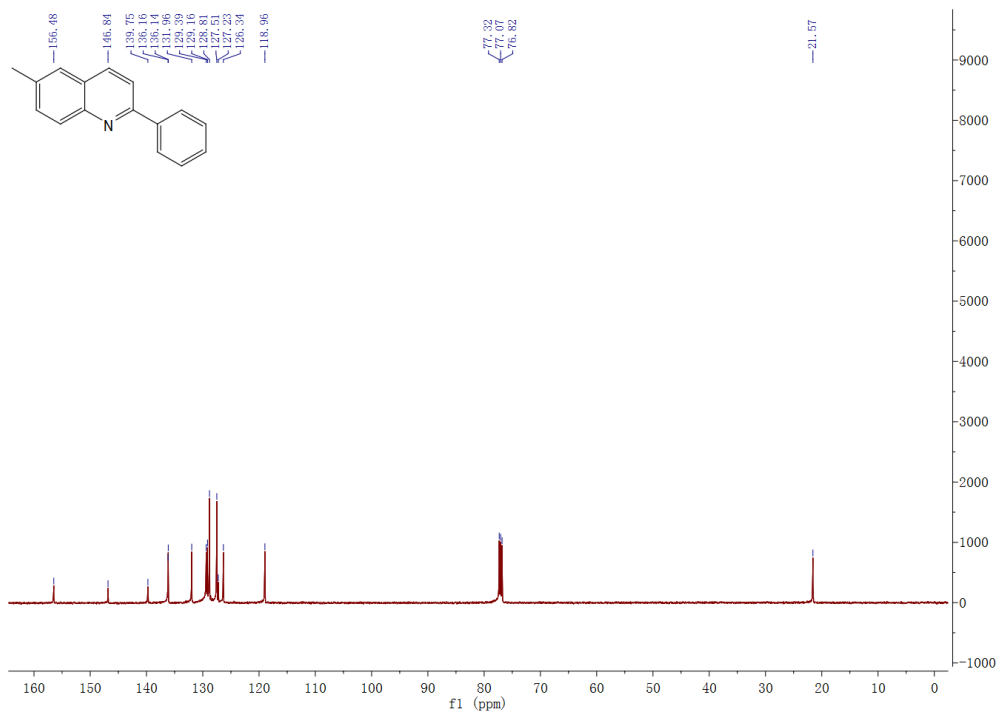

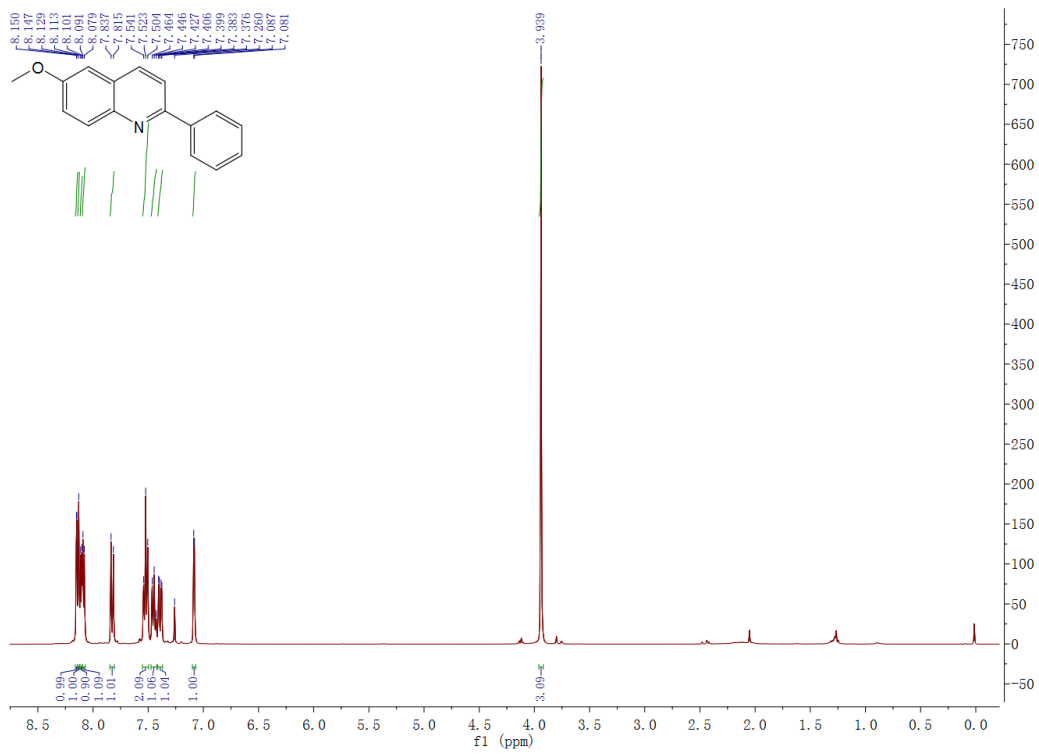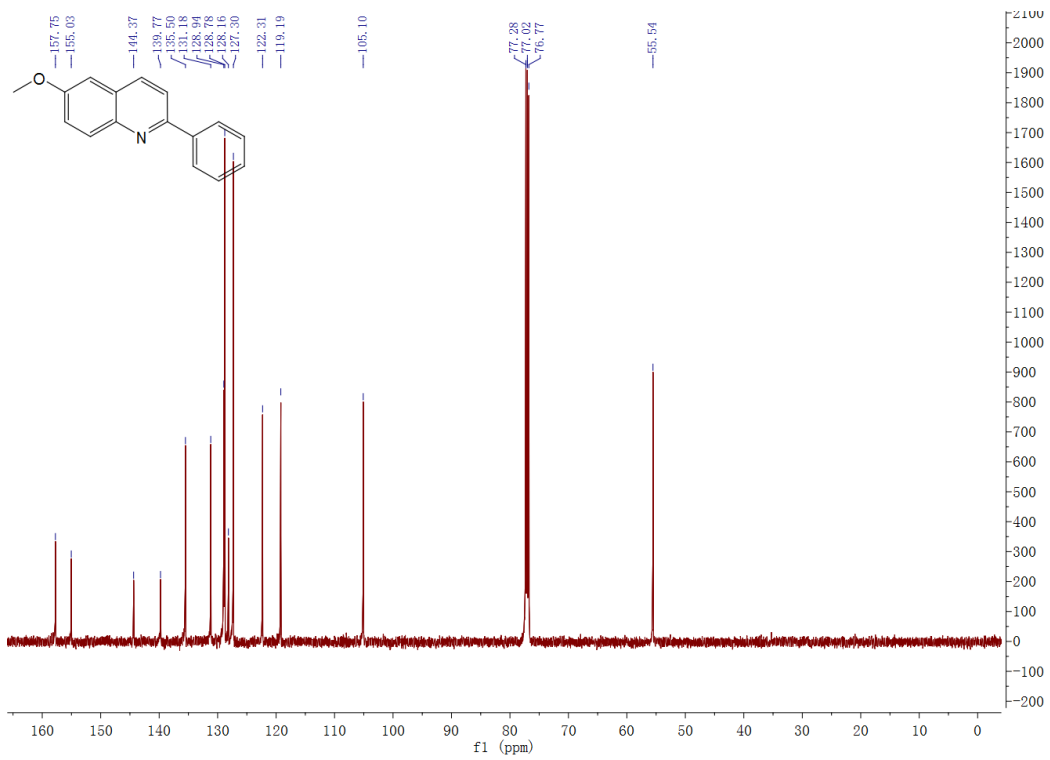

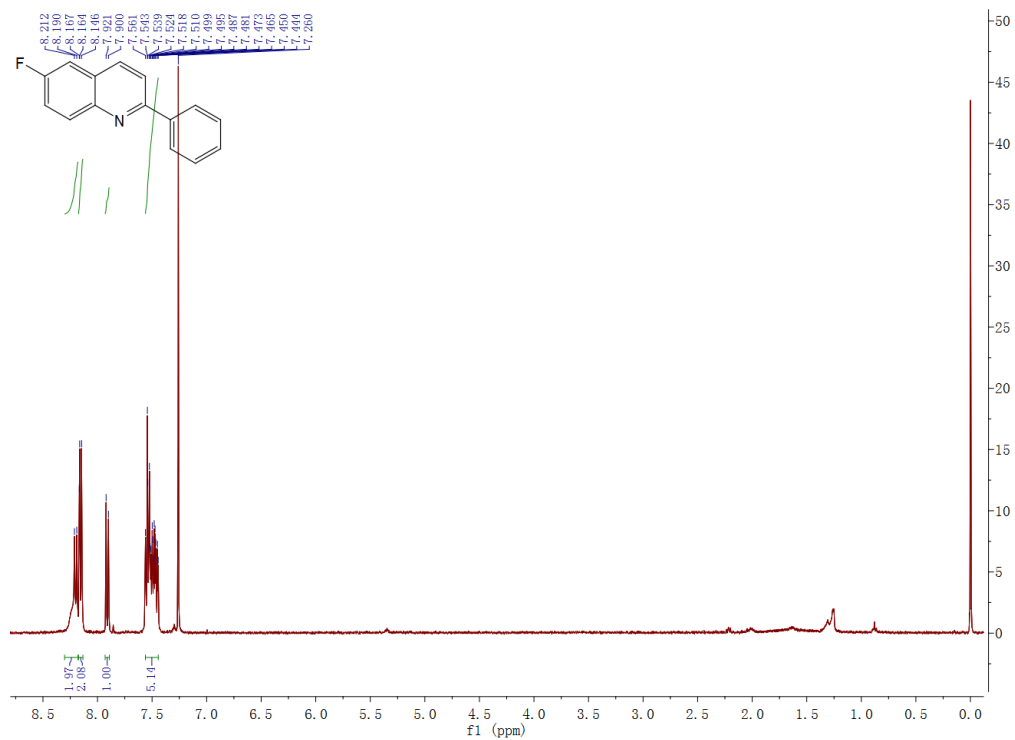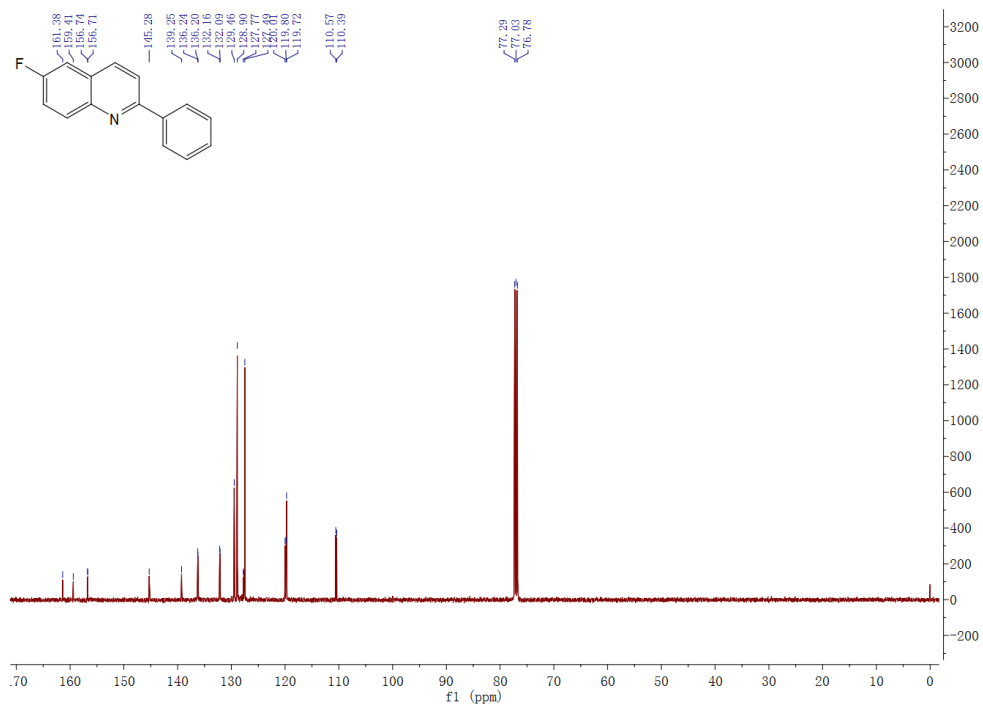

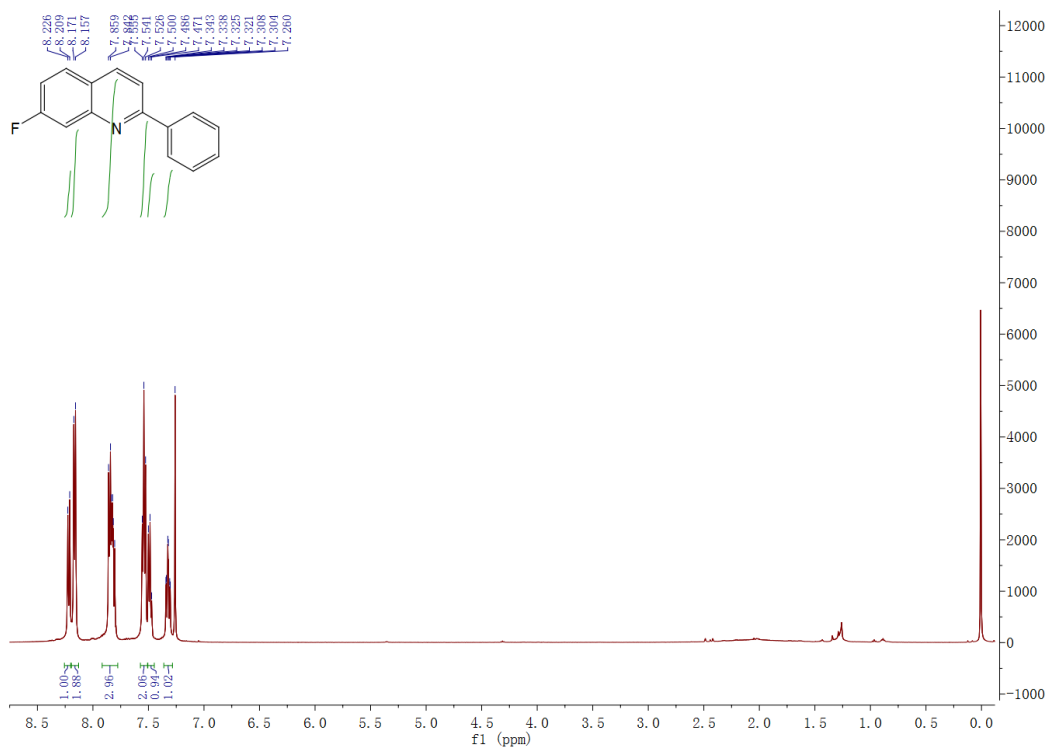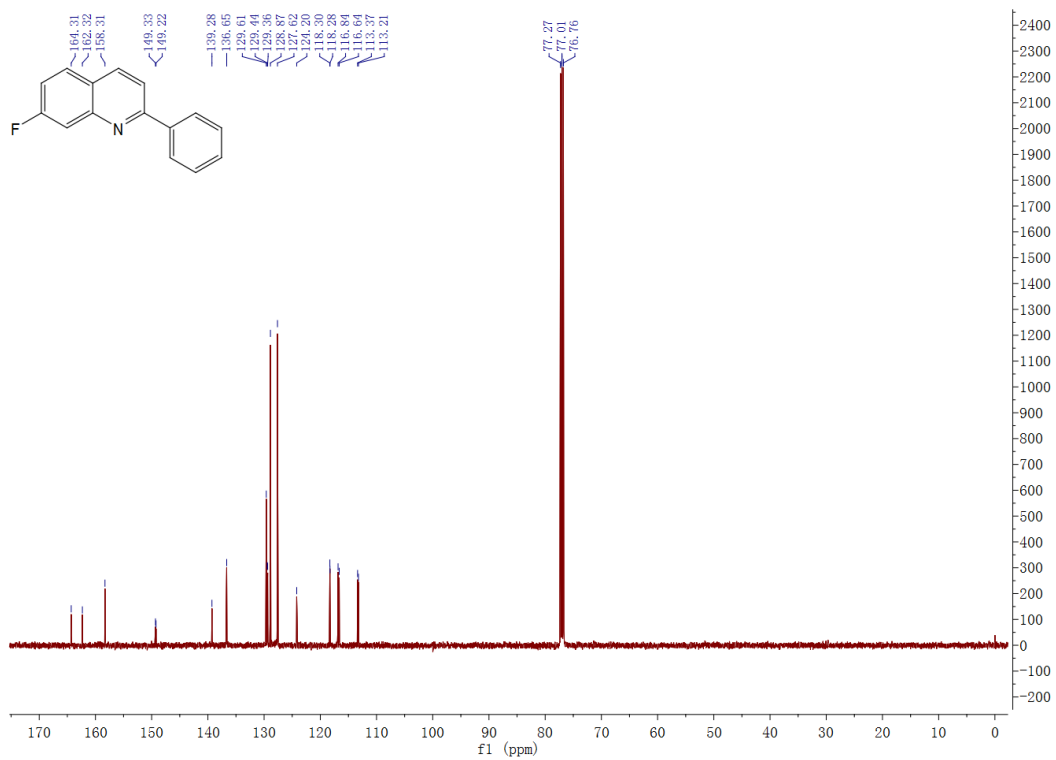

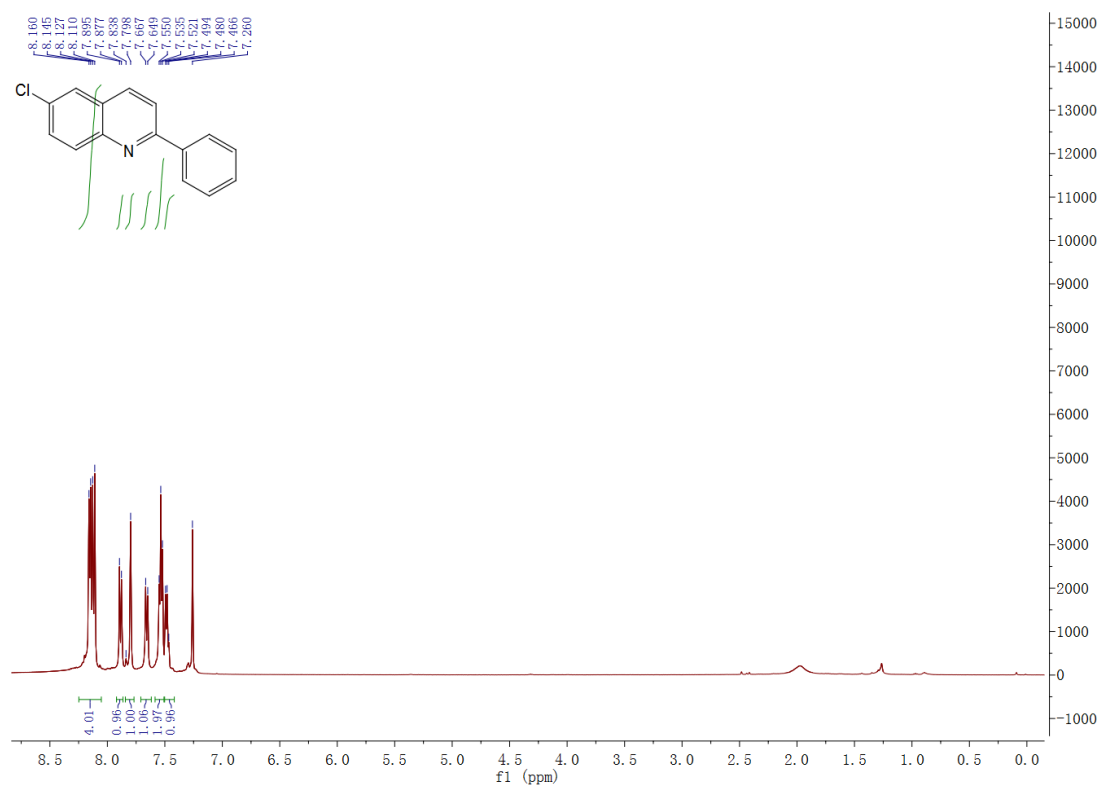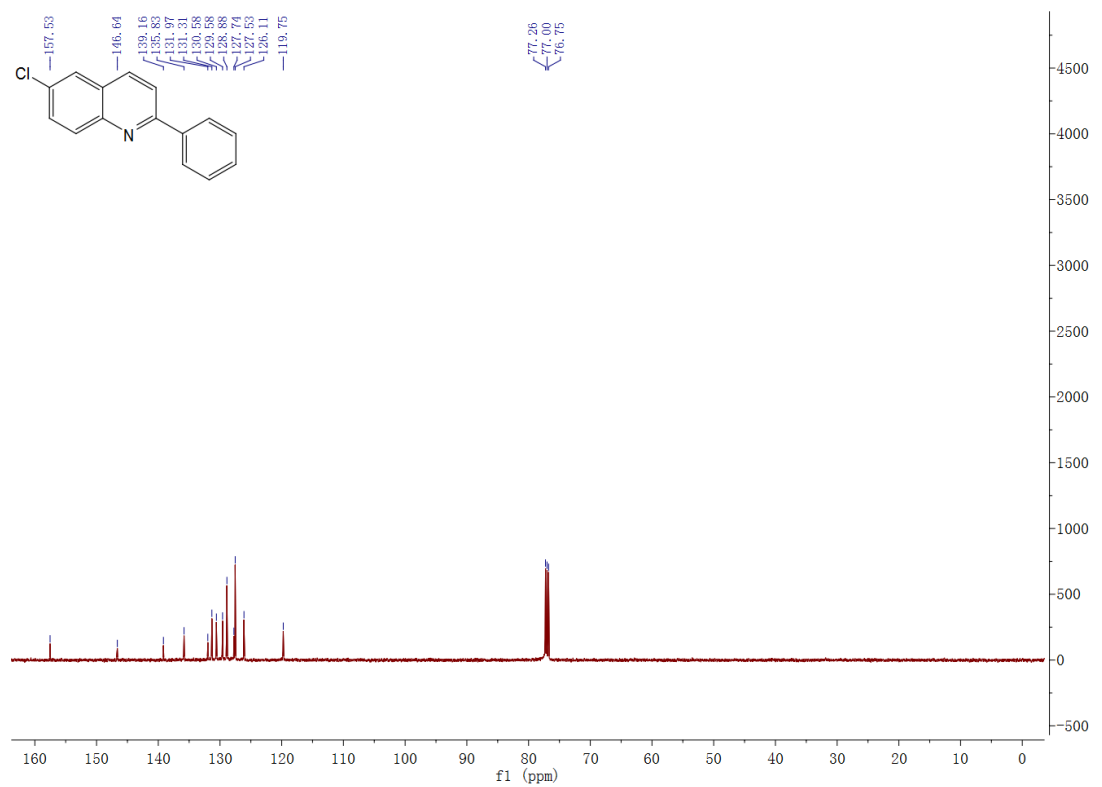

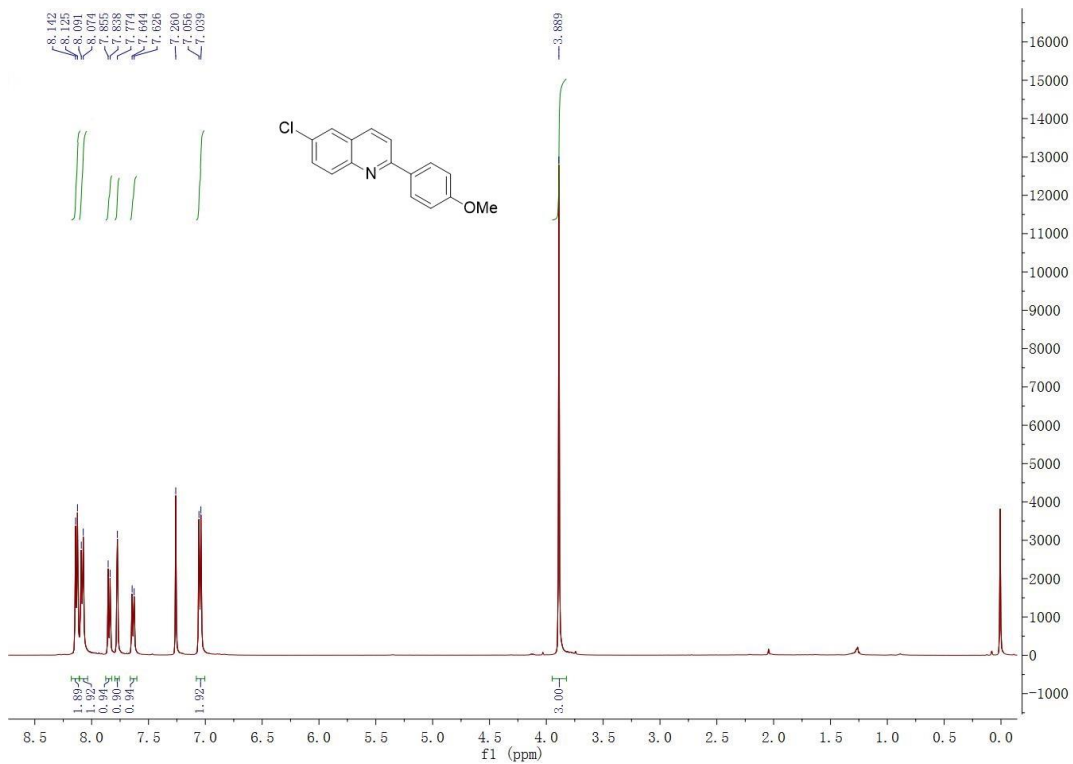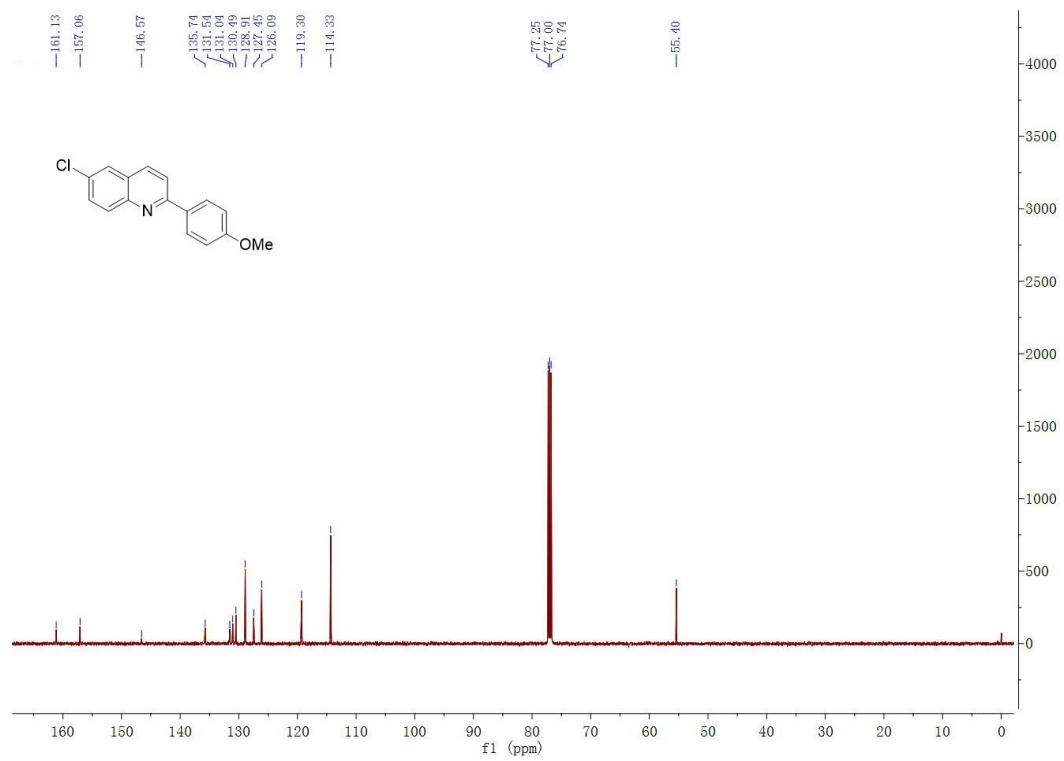

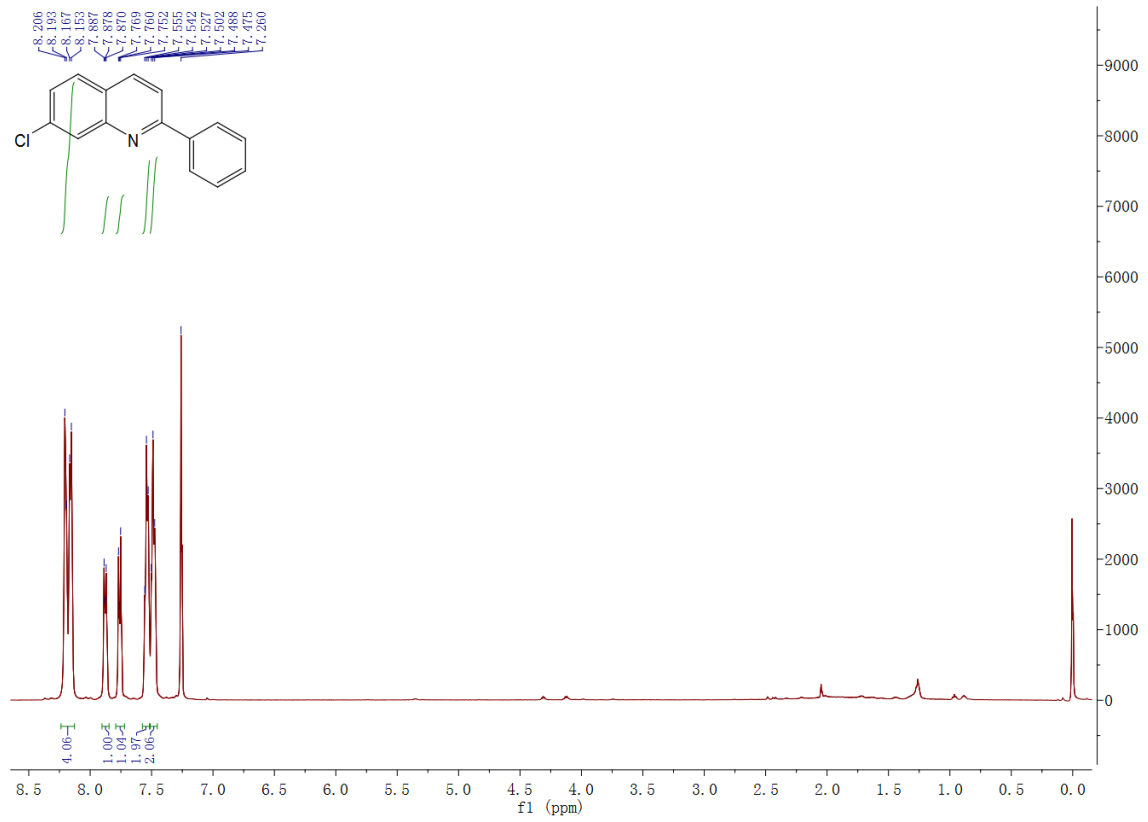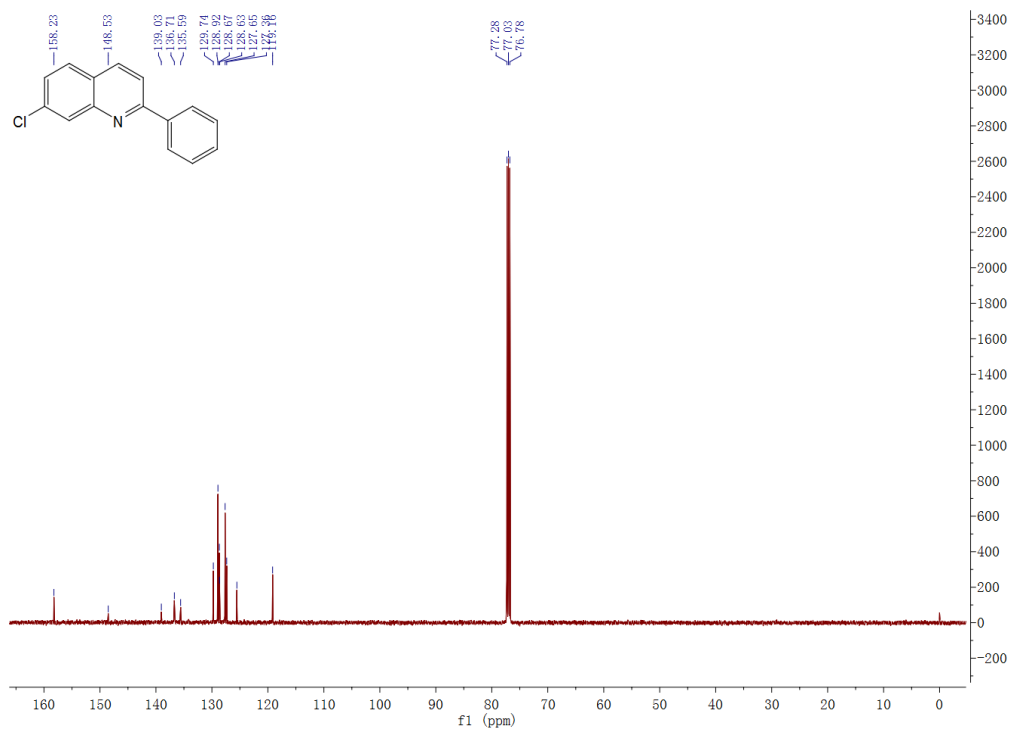



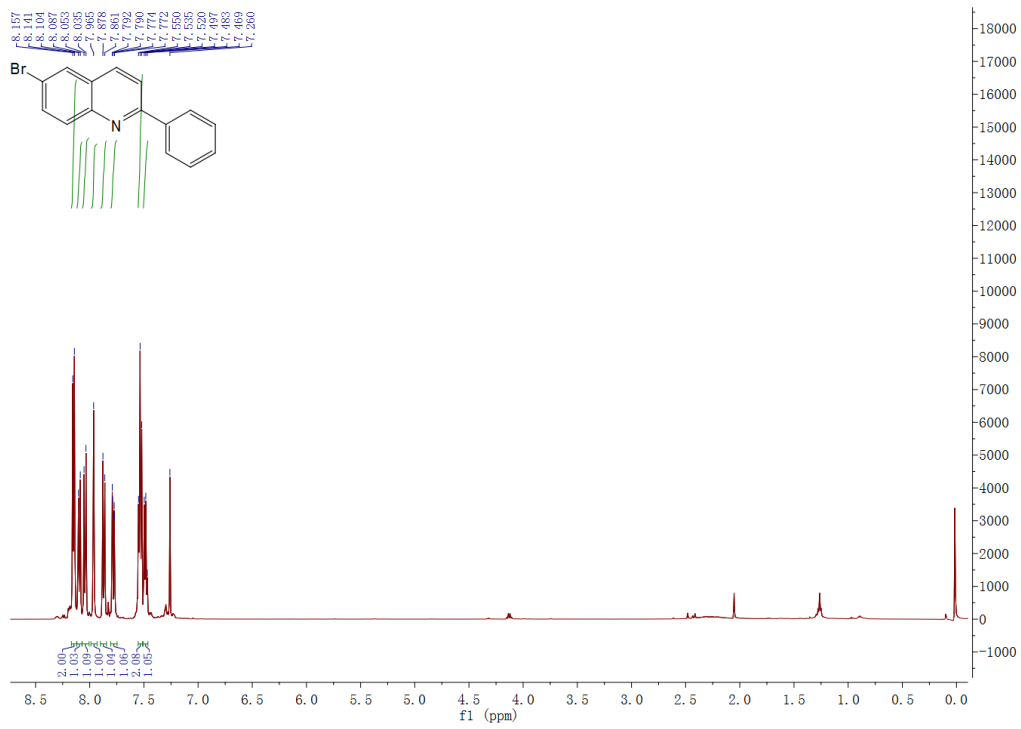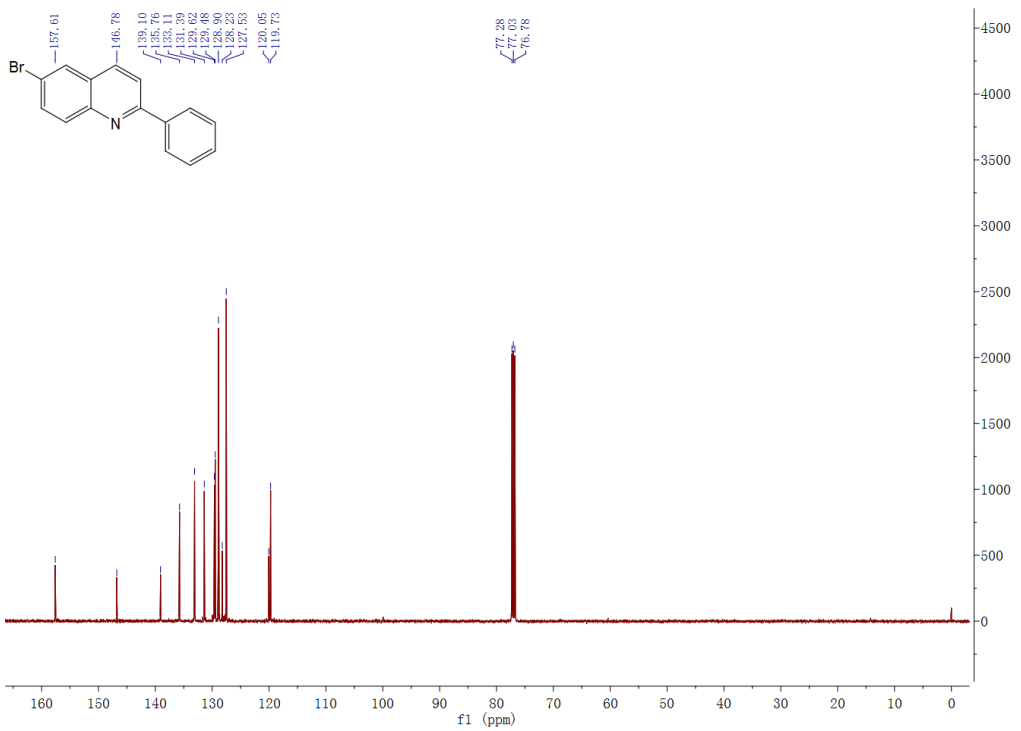

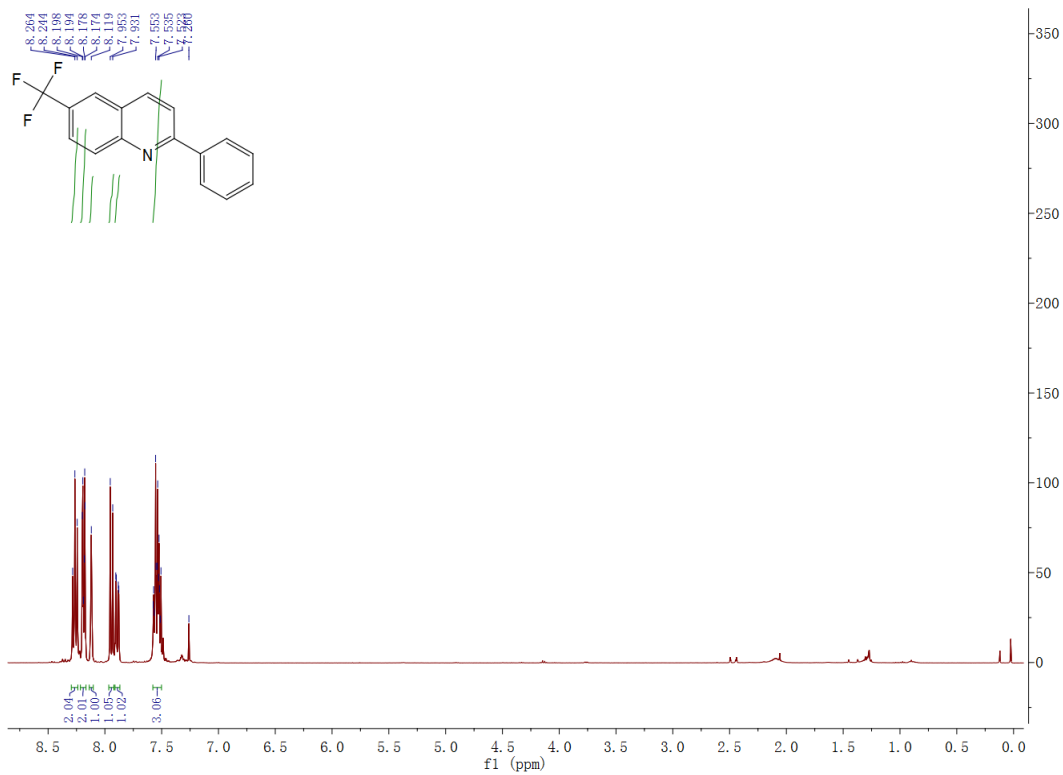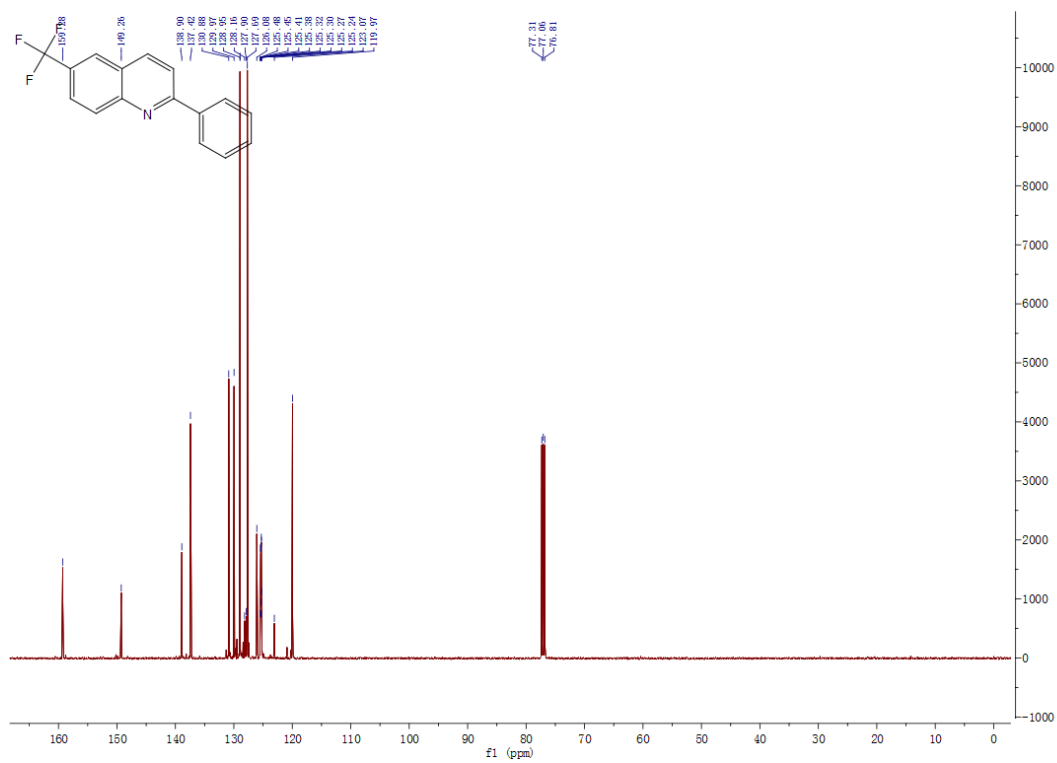

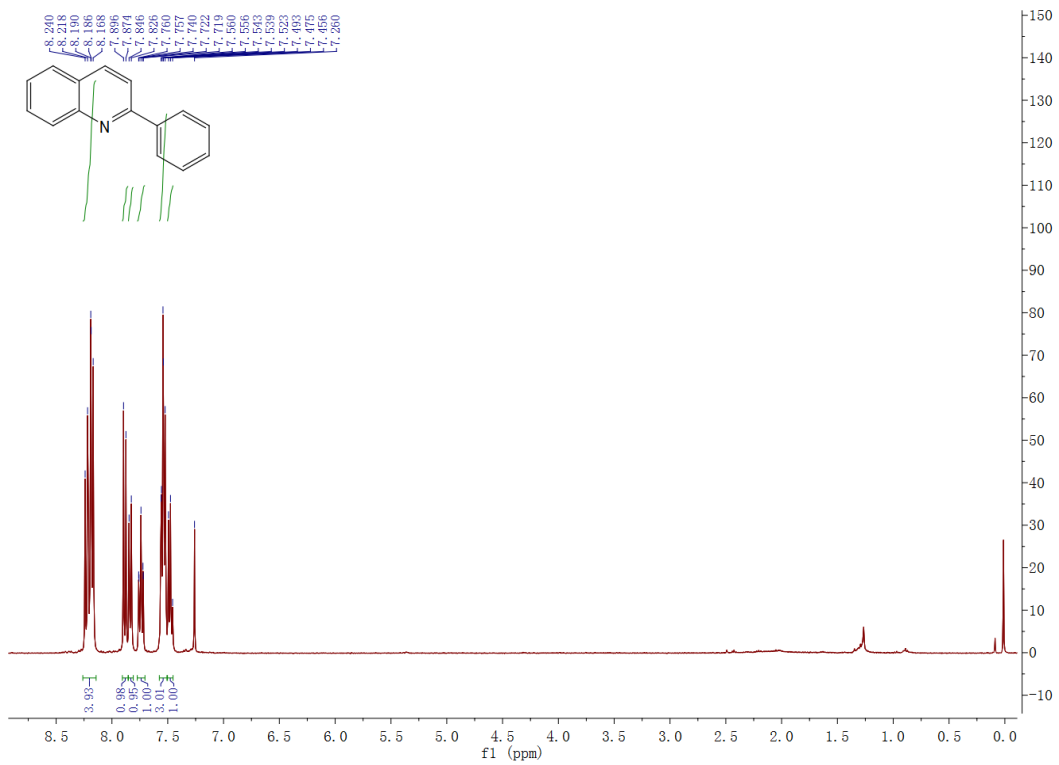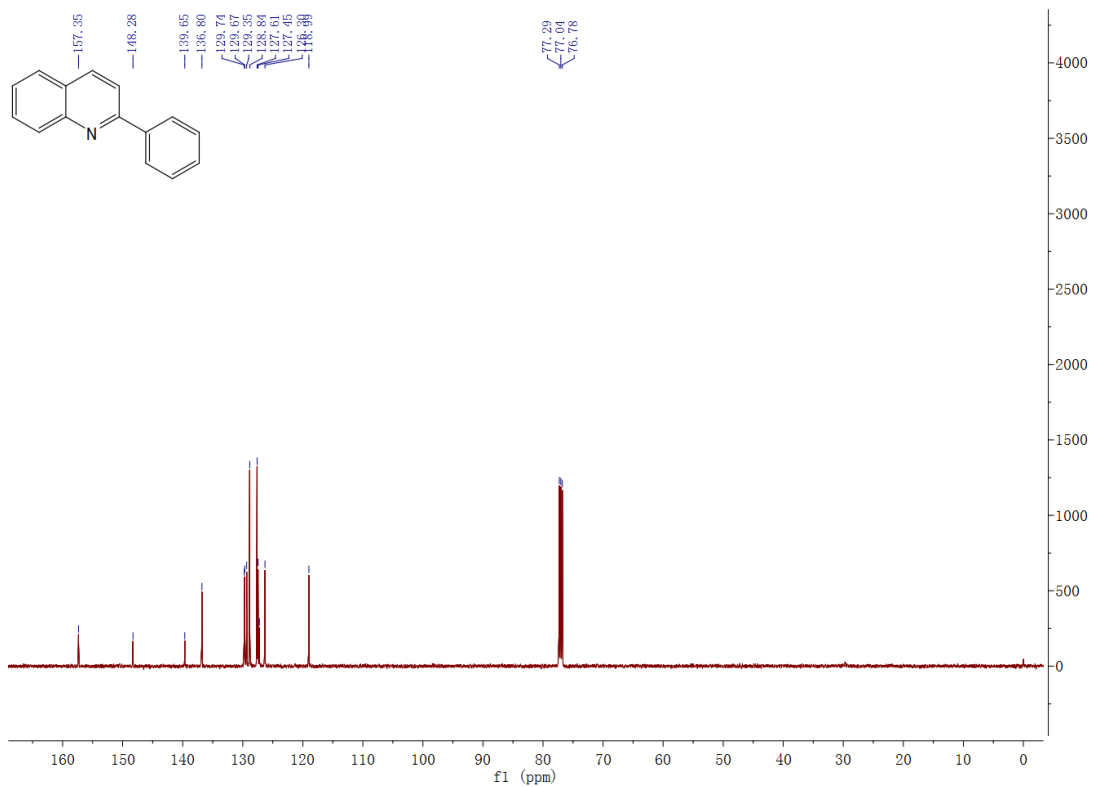

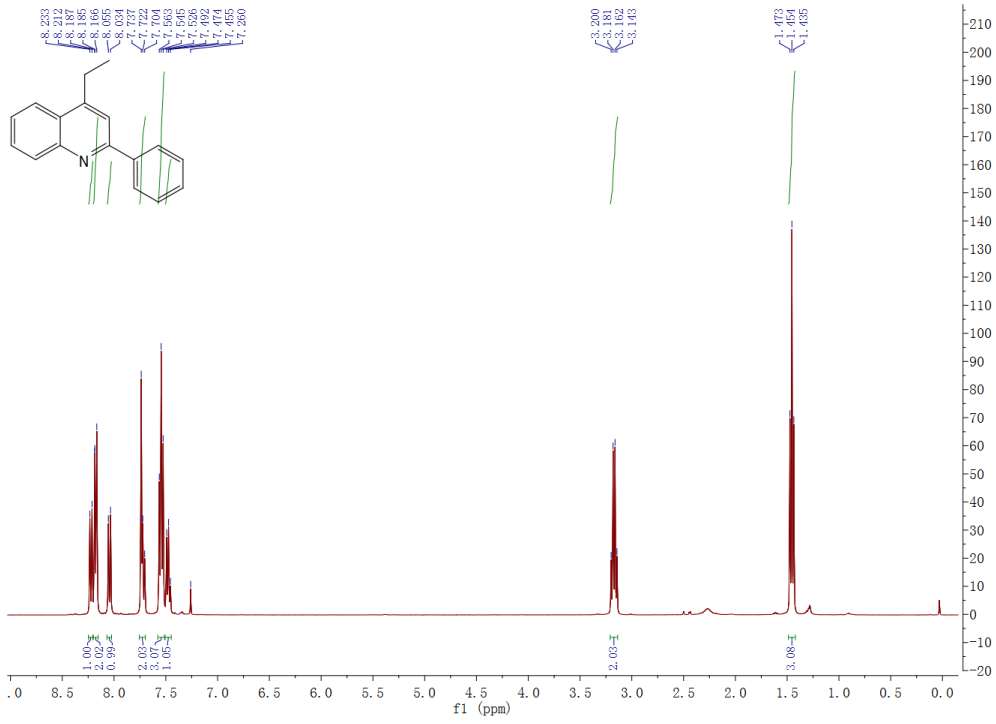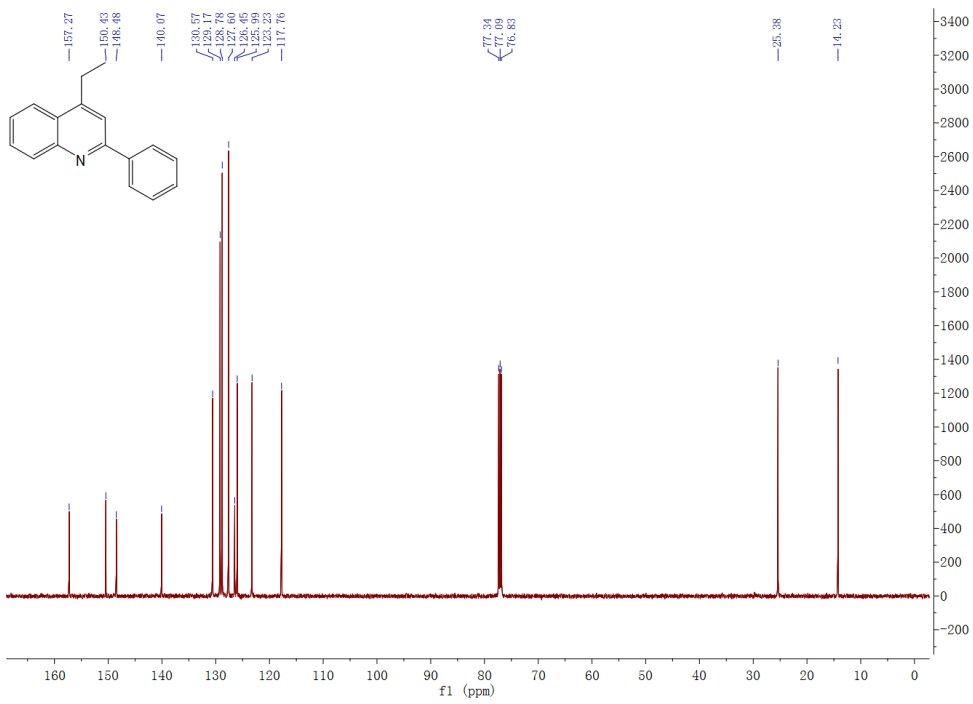

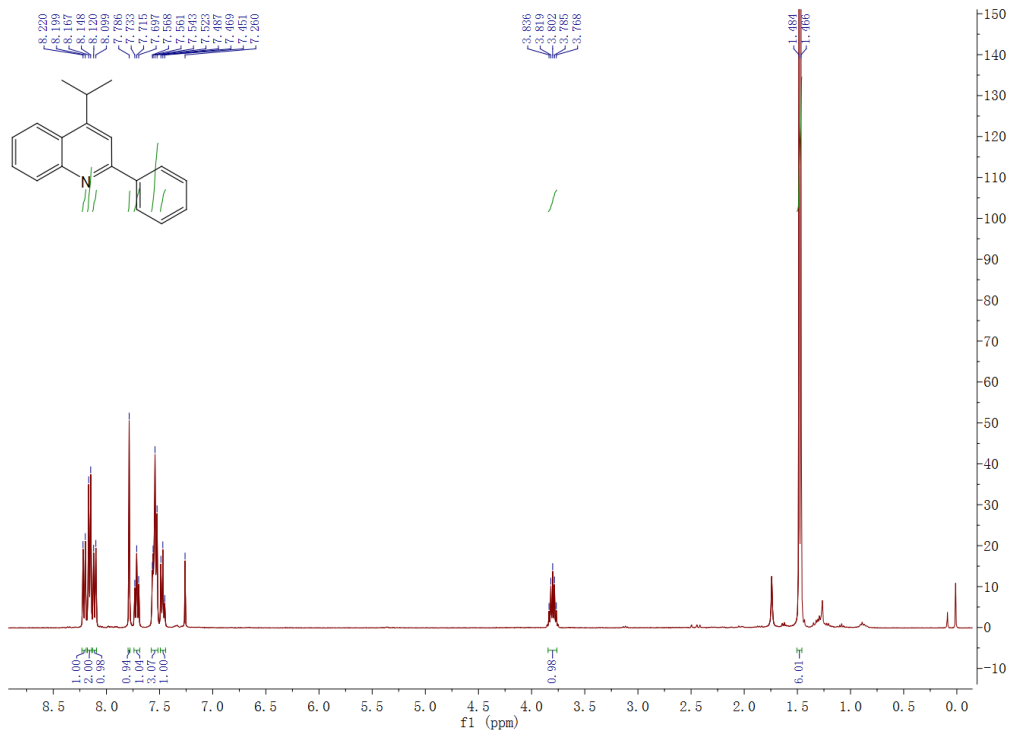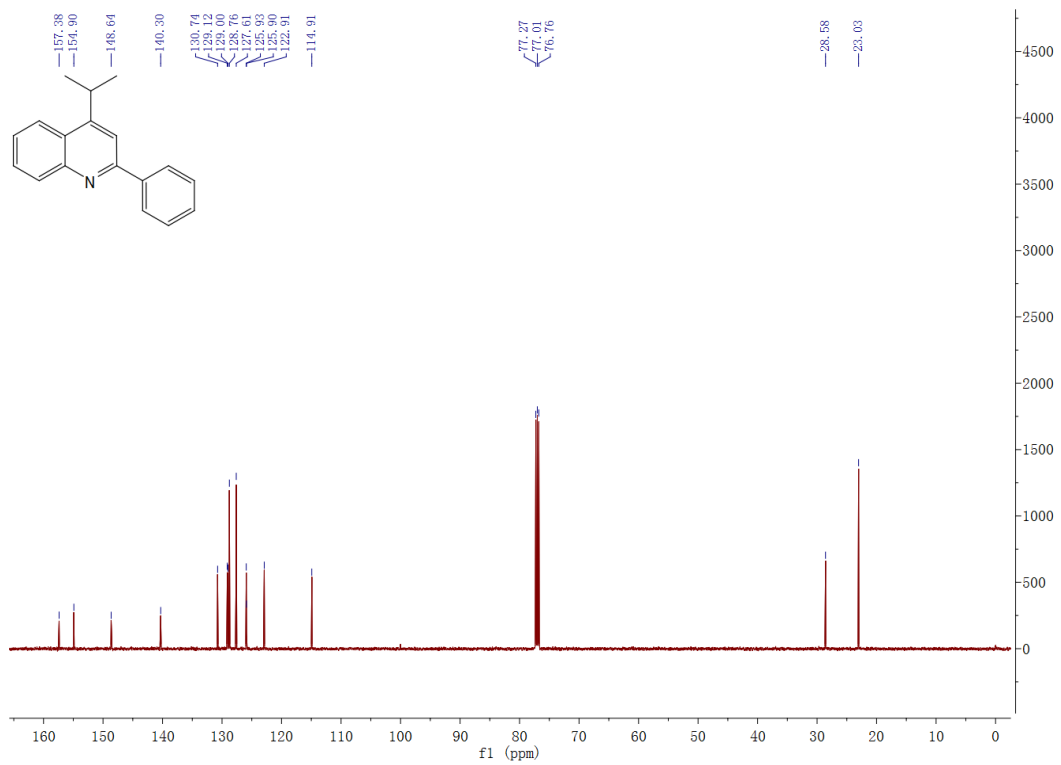

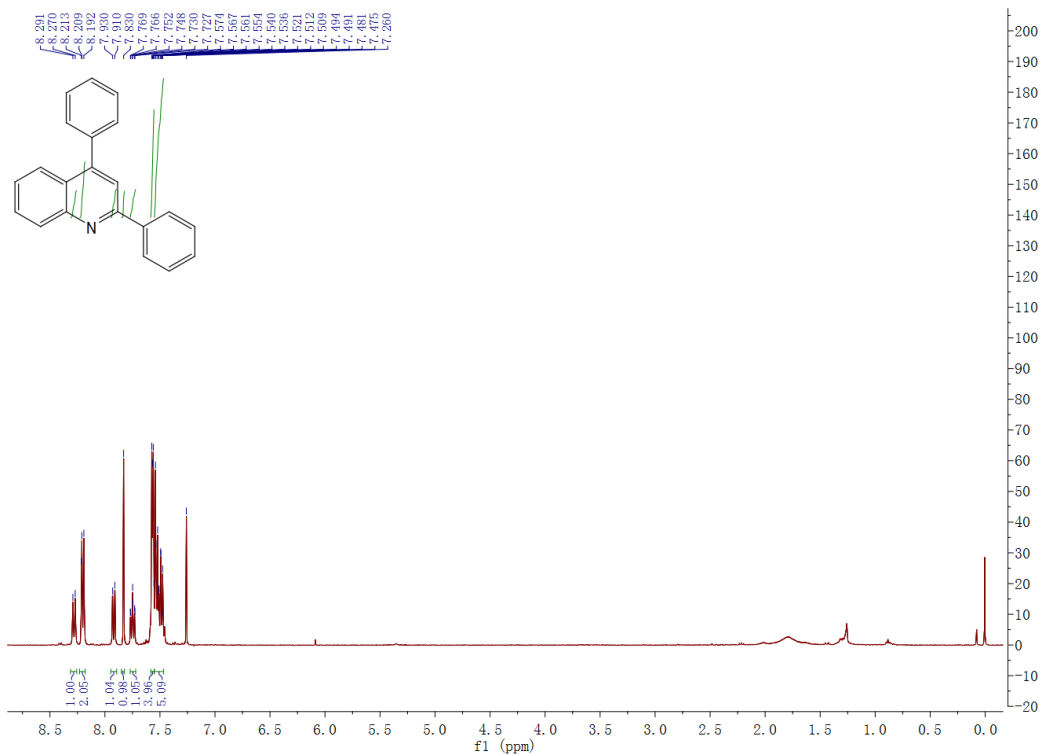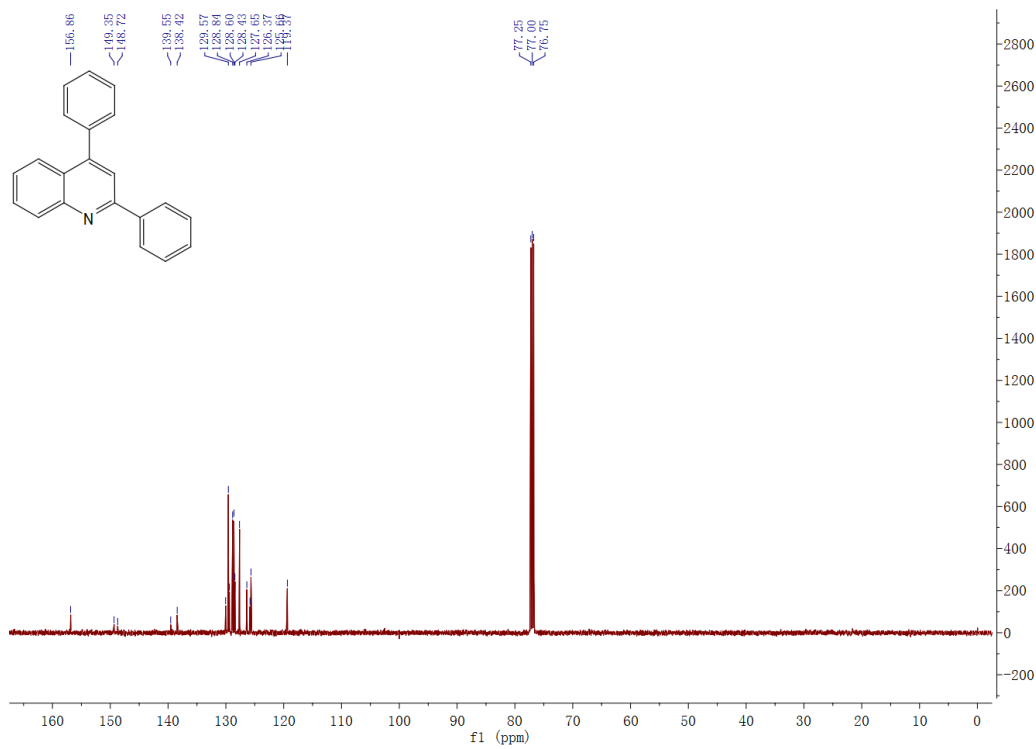

Supplement: d0ra01043j1.pdf [file d0ra01043j1.pdf]
